# Supplementary material for: Host responses to Clostridium perfringens challenge in a chicken model of chronic stress
Source: Springer Nature journal article supplement (doi:10.1186/s13099-020-00362-9), 2020-05-06
Supplement: MOESM2 [file 17959536]

## **Host responses to *Clostridium perfringens* challenge in a chicken model of chronic stress**

**Sarah J.M. Zaytsoff,<sup>a,b</sup> Sarah M. Lyons,<sup>c</sup> Alexander M. Garner,<sup>d</sup> Richard R.E. Uwiera,<sup>b</sup> Wesley F. Zandberg,<sup>c,e</sup> D. Wade Abbott,<sup>a</sup> G. Douglas Inglis<sup>a#</sup>**

<sup>a</sup>Agriculture and Agri-Food Canada, Lethbridge, Alberta, Canada

<sup>b</sup>Department of Agricultural, Food, and Nutritional Science, University of Alberta, Edmonton, Alberta, Canada

<sup>c</sup>Department of Biology, University of British Columbia (Okanagan Campus), Kelowna, British Columbia, Canada

<sup>d</sup>Department of Biochemistry, University of British Columbia (Okanagan Campus), Kelowna, British Columbia, Canada

<sup>e</sup>Department of Chemistry, University of British Columbia (Okanagan Campus), Kelowna, British Columbia, Canada

## SUPPLEMENTAL MATERIAL

**Table S1.** Feed ingredients for 21% poultry starter diet

| <b>Ingredient List</b> | <b>Minerals</b>               | <b>Vitamins</b>      |
|------------------------|-------------------------------|----------------------|
| Wheat                  | Copper Sulfate                | Vitamin A            |
| Soybean meal           | Ethylenediamine dihydroiodide | Vitamin D            |
| Canola meal            | Manganese Sulfate             | Vitamin E            |
| Corn distillers        | Sodium Selenite               | Vitamin K            |
| Faba beans             | Zinc Oxide                    | Thiamine monohydrate |
| L-Lysine HCl           | Copper Proteinate             | Pyridoxine           |
| Enzyme                 | Manganese Proteinate          | Calcium pantothenate |
| Choline chloride       | Selenium Yeast                | Niacin               |
| ALIMET                 | Zinc Proteinate               | Riboflavin           |
| Limestone              |                               | Biotin               |
|                        |                               | Folic acid           |
|                        |                               | Vitamin B12          |
|                        |                               | Ethoxyquin           |

**Table S2.** List of primers used for qPCR and mRNA gene expression

| Name                                 | Abbreviation | Sequence 5' to 3' |                               | Product Size | Reference Sequence | Source         |
|--------------------------------------|--------------|-------------------|-------------------------------|--------------|--------------------|----------------|
| <i>C. perfringens</i> (16S)          | CP1.2        | Forward           | AAAGATGGCATCATCATTCAAC        | 283          |                    | PMID: 12399288 |
|                                      |              | Reverse           | TACCGTCATTATCTTCCCAAA         |              |                    |                |
| NetB Toxin                           | NetB         | Forward           | AAATATACTTCTAGTGATACCGCTTCACA | 78           |                    | PMID: 20457789 |
|                                      |              | Reverse           | GAGGATCTTCAATAAATGTTCCACTTAA  |              |                    |                |
| Toll-like receptor 2A                | TLR2A        | Forward           | CAGCACAAGAGGCGTTCA            | 100          | NM_204278.1        | This Study     |
|                                      |              | Reverse           | AACATTTTGGTGTAGCTGAGATG       |              |                    |                |
| Toll-like receptor 15                | TLR15        | Forward           | ACTAGAACCTGCCTGCCAAC          | 102          | NM_001037835.1     | This Study     |
|                                      |              | Reverse           | AGCATCAGGAGAGATTGCC           |              |                    |                |
| Claudin 3                            | CLDN3        | Forward           | GGGATTCTACAACCCGCTG           | 200          | NM_204202.1        | This Study     |
|                                      |              | Reverse           | CTGTCTGAGCTGGTAAACGG          |              |                    |                |
| Claudin 5                            | CLDN5        | Forward           | GGGACTAAATGCAGAGACC           | 128          | NM_204201.1        | This Study     |
|                                      |              | Reverse           | ATAGCCTAAGCATCACGAGC          |              |                    |                |
| Occludin                             | OCLN         | Forward           | TGAATGCACCCACTGAGTGTT         | 99           | NM_205128.1        | This Study     |
|                                      |              | Reverse           | CCAGAGGTGTGGCCTTAC            |              |                    |                |
| Mucin 2B                             | MUC2B        | Forward           | ATTGTGTAACACCAACATTCATC       | 135          |                    | PMID: 23349743 |
|                                      |              | Reverse           | CTTTATAATGTCAGCACCAACTTCTC    |              |                    |                |
| Mucin 5AC                            | MUC5AC       | Forward           | TCCACCAGTTCCTCAATCCC          | 79           | XM_015286693.1     | This Study     |
|                                      |              | Reverse           | GGGGTTGCCAGCCTTTACTT          |              |                    |                |
| Interleukin 1 $\beta$                | IL1 $\beta$  | Forward           | TGCCTGCAGAAGAAGCCTCG          | 137          | NM_204524.1        | This Study     |
|                                      |              | Reverse           | CTCCGCAGCAGTTTGTCAT           |              |                    |                |
| Interleukin 2                        | IL2          | Forward           | TAACTGGGACACTGCCATGA          | 93           | NM_204153.1        | This Study     |
|                                      |              | Reverse           | GATAGAGATGCTCCATAAGCTGT       |              |                    |                |
| Interleukin 18                       | IL18         | Forward           | GTGAAGAGATCGCTGTGTGT          | 80           | NM_204608.1        | This Study     |
|                                      |              | Reverse           | ATCGCATTCCAGCTCATCATC         |              |                    |                |
| Interferon $\gamma$                  | IFN $\gamma$ | Forward           | GCTCCCGATGAACGACTTGA          | 121          | NM_205149.1        | This Study     |
|                                      |              | Reverse           | GCATCTCTCTGAGACTGGC           |              |                    |                |
| Interleukin 6                        | IL6          | Forward           | AGGACGAGATGTGCAAGAAG          | 176          | NM_204628.1        | This Study     |
|                                      |              | Reverse           | CATTTCTCTCGTCGAAGCC           |              |                    |                |
| Transforming Growth Factor $\beta$ 2 | TGF $\beta$  | Forward           | CCATCTACAACAGCACCAGGG         | 157          | NM_001031045.3     | This Study     |
|                                      |              | Reverse           | TAGCTTGGTGGGATGGCATTTC        |              |                    |                |
| Colony Stimulating Factor 3          | G-CSF        | Forward           | AACTTATTTGTGCCCCACG           | 84           | NM_205279.1        | This Study     |
|                                      |              | Reverse           | ATACAGTACAAAACGCCGCC          |              |                    |                |
| $\beta$ -Actin                       | BA           | Forward           | CTCTGACTGACCGCTTACT           | 172          | NM_205518.1        | This Study     |
|                                      |              | Reverse           | TACCAACCATCACACCCTGAT         |              |                    |                |
| Tata-Box Binding Protein             | TBP          | Forward           | GTTCCCTGTGTCGCTTGC            | 147          |                    | PMID: 27685470 |
|                                      |              | Reverse           | TAGCCCGATGATGCCGAT            |              |                    |                |
